# Supplementary material
Source: PubMed Central journal article supplement (PMC3014017)
Supplement: supp_ASN.2010010003_Supplementary_Figures-IkBDNJASN.pdf [file supp_ASN.2010010003_Supplementary_Figures-IkBDNJASN.pdf]

**Fibroblast expression of an I $\kappa$ B-dominant negative transgene  
attenuates renal fibrosis**

Tsutomu Inoue<sup>1</sup>, Tsuneo Takenaka<sup>1</sup>, Matsuhiko Hayashi<sup>2</sup>, Toshiaki Monkawa<sup>3</sup>,  
Jun Yoshino<sup>3</sup>, Kouji Shimoda<sup>4</sup>, Eric G. Neilson<sup>5</sup>, Hiromichi Suzuki<sup>1</sup>,  
and Hirokazu Okada<sup>1</sup>

<sup>1</sup>Department of Nephrology, Faculty of Medicine, Saitama Medical University, Saitama, and  
<sup>2</sup>Apheresis and Dialysis Center, <sup>3</sup>Department of Internal Medicine, and <sup>4</sup>Laboratory Animal  
Center, Keio University School of Medicine, Tokyo, Japan; <sup>5</sup>Department of Medicine, Vanderbilt  
University School of Medicine, Nashville, TN, USA

## Supplementary Figure Legends

**Figure S1. *FSP1.Cre;EGFP* and  $\gamma$ *GT.Cre;EGFP* cells in the kidneys.** **A.** Compared with untreated kidneys, a larger number of *FSP1* promoter-driven EGFP<sup>+</sup> fibroblasts (in Green) were found in the widened interstitium of obstructed kidneys of *FSP1.Cre;EGFP* mice. EGFP<sup>+</sup> tubular epithelia (in Green) were observed in untreated kidneys of  $\gamma$ *GT.Cre;EGFP* mice. In the obstructed kidney, in contrast,  $\gamma$ *GT* promoter-driven EGFP<sup>+</sup> cells were found in tubular epithelia and among solitary cells in the widened interstitium; nuclei were stained blue with TO-PRO-3. When the basement membrane was stained by periodic acid-Schiff reaction (in Red), many of all the EGFP<sup>+</sup> cells were identified as interstitial cells surrounding tubules, which were likely to be derived from tubular epithelia by EMT. **B.** Most of *FSP1* promoter-driven EGFP<sup>+</sup> fibroblasts (in Green) were simultaneously positive for HSP47 (in Red) (arrows), suggesting production of collagen proteins. Some of  $\gamma$ *GT* promoter-driven EGFP<sup>+</sup> interstitial cells were simultaneously positive for HSP47 (arrows), suggesting production of collagen proteins. *FSP1* promoter-driven EGFP<sup>+</sup> fibroblasts were not macrophages since they were not positive for F4/80. (Objective lens 40x; bar=100  $\mu$ m)

**Figure S2.** Inhibition of NF- $\kappa$ B activation suppressed fibrosis-related gene transcription in cultured mouse renal fibroblasts, TFB. The TFB cells<sup>14</sup> were seeded in 6-well plates ( $1 \times 10^5$  cells/well) and incubated overnight in growth medium, after which the medium was replaced with D-MEM containing 0.5% FCS and the cells were incubated for 48 hr prior to subsequent experiments. To examine the effects of NF- $\kappa$ B activation in these cells, an I $\kappa$ K inhibitor, BMS-345542 (Calbiochem, San Diego, CA) (2  $\mu$ M) was added to the cultures 30 min prior to stimulation with rhTGF- $\beta$ 1 (3.0 ng/mL) or rhTNF- $\alpha$  (3.0 ng/mL). After an incubation of another 1 and 6 hr, the cells were harvested for nuclear protein and RNA extraction, respectively.

Electrophoretic mobility shift assay was performed according to the method reported previously.<sup>41</sup> One hr treatment with TGF- $\beta$ 1 induced nuclear translocation of NF- $\kappa$ B in TFB cells as TNF- $\alpha$  did, and pretreatment with BMS-345542 suppressed it (A). B. Six hr treatment with TNF- $\alpha$  significantly increased the levels of MCP-1 mRNA in TFB cells, while treatment with TGF- $\beta$ 1 significantly increased the mRNA levels of PAI-1 and FN-EIIIA, but not MCP-1 in TFB cells, the former of which was suppressed by BMS-345542 pretreatment. Data shown in B were obtained from 3 independent experiments.

**A**

FSP1.Cre;EGFP-untx

FSP1.Cre;EGFP-obst

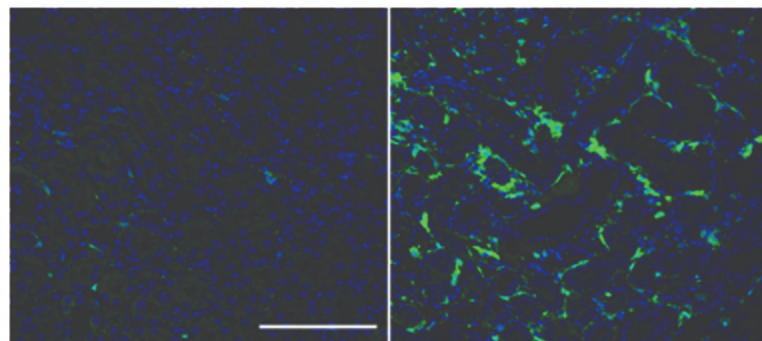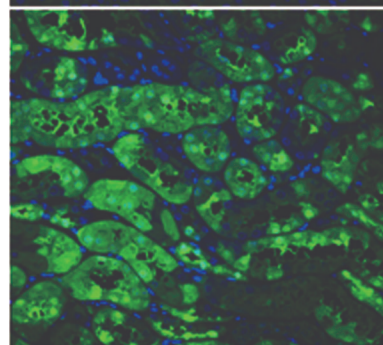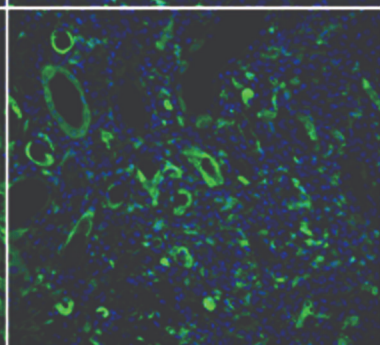 $\gamma$ GT.Cre;EGFP-untx $\gamma$ GT.Cre;EGFP-obst $\gamma$ GT.Cre;EGFP-obst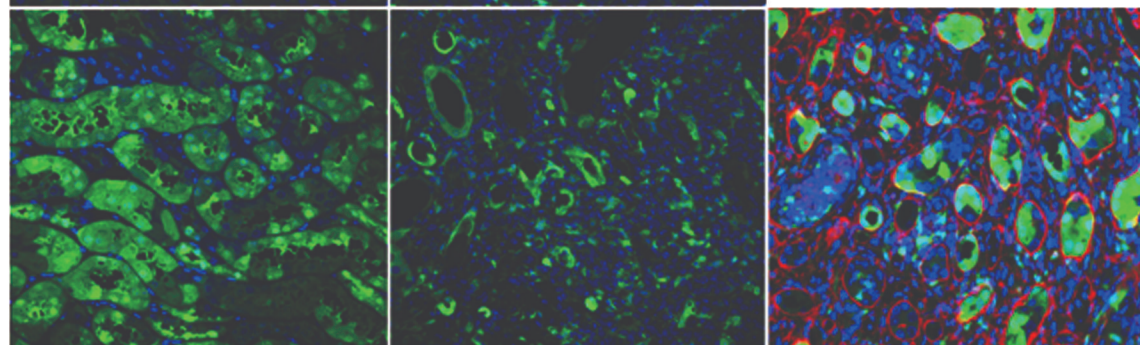**B**FSP1.Cre;EGFP-obst  
(HSP47)FSP1.Cre;EGFP-obst  
(F4/80)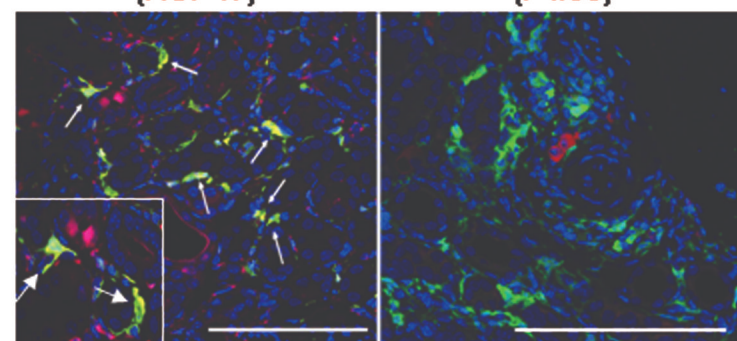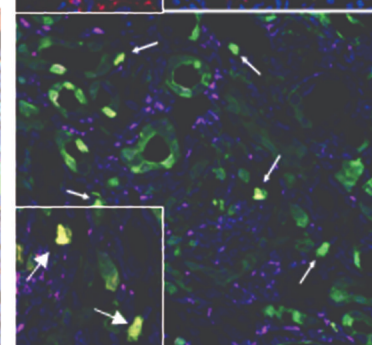 $\gamma$ GT.Cre;EGFP-obst  
(HSP47)**Figure S1**

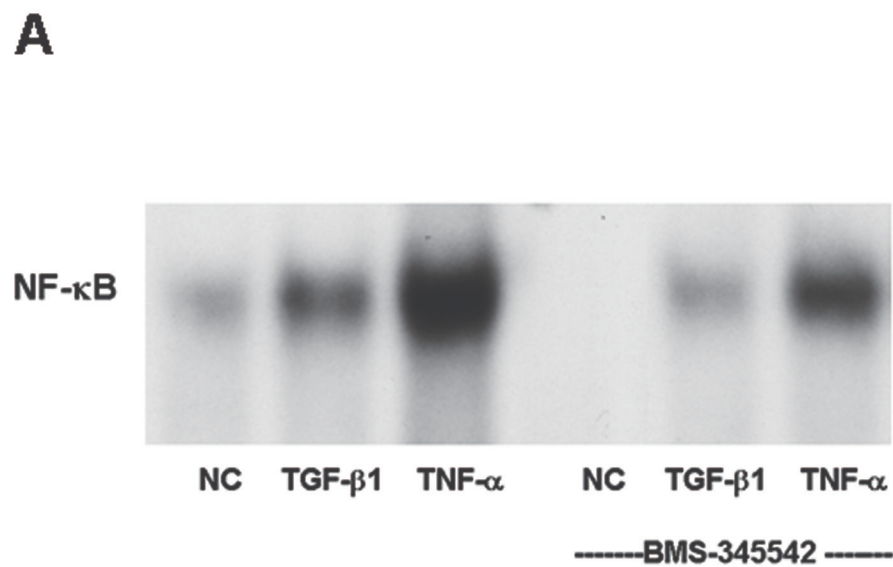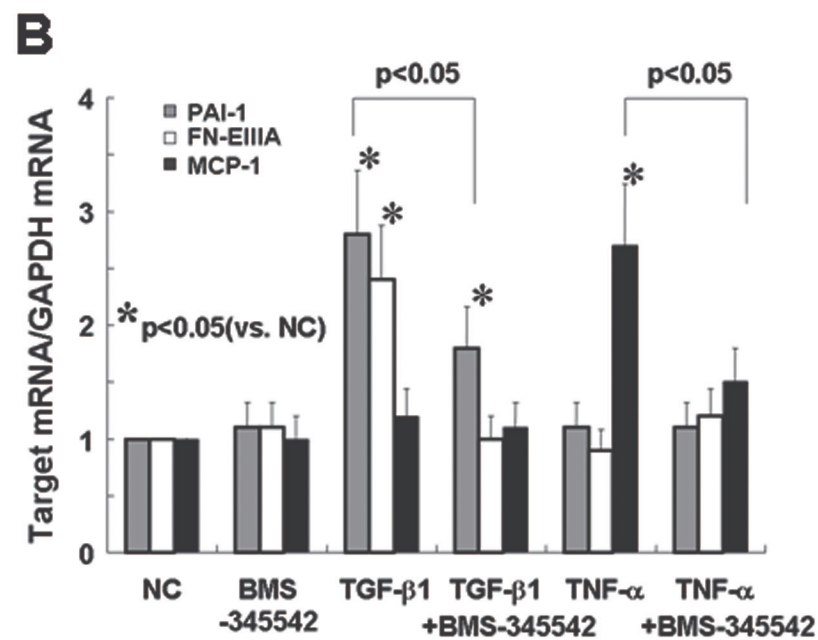

Figure S2
